# Supplementary material for: In-Situ Monitoring of Real-Time Loop-Mediated Isothermal Amplification with QCM: Detecting Listeria monocytogenes
Source: MDPI journal article supplement (doi:10.3390/bios11090308), 2021-08-31
Supplement: s1 [file s1]

# In-situ Monitoring of Real-Time Loop-Mediated Isothermal Amplification with QCM: Detecting *Listeria monocytogenes*

Sirirat Wachiralurpan <sup>1,\*</sup>, Isaratat Phung-On <sup>1</sup>, Narong Chanlek <sup>2</sup> Supatra Areekit <sup>3,4</sup>, Kosum Chansiri <sup>4,5</sup> and Peter A. Lieberzeit <sup>6,\*</sup>

<sup>1</sup> Maintenance Technology Center, Institute for Scientific and Technological Research and Services, King Mongkut's University of Technology Thonburi, 126 Prachautit Rd., Bangkok 10140, Thailand; sirirat.wac@gmail.com, isaratat.phu@kmutt.ac.th

<sup>2</sup> Synchrotron Light Research Institute (Public Organization), 111 University Avenue, Muang District, Nakhon Ratchasima 30000, Thailand; narong@slri.or.th

<sup>3</sup> Innovative Learning Center, Srinakharinwirot University, Sukhumvit 23, Bangkok 10110, Thailand; supatraa@g.swu.ac.th

<sup>4</sup> Center of Excellence in Biosensors, Panyanantaphikkhu Chonprathan Medical Center, Srinakharinwirot University, 222 Moo1 Tiwanon Rd., Pakkred district, Nonthaburi 11120, Thailand; supatraa@g.swu.ac.th, prof.kosum@gmail.com

<sup>5</sup> Department of Biochemistry, Faculty of Medicine, Srinakharinwirot University, Sukhumvit 23, Bangkok 10110, Thailand; prof.kosum@gmail.com

<sup>6</sup> Department of Physical Chemistry, Faculty for Chemistry, University of Vienna, Waehringer Strasse 42, Vienna 1090, Austria; peter.lieberzeit@univie.ac.at

\* Correspondence: sirirat.wac@gmail.com (S.W.); peter.lieberzeit@univie.ac.at (P.A.L.)

## 1. Estimation of mass and molecule numbers on the working surface.

The irreversible signal ( $\Delta F$ , Hz), is given in Eq. (1) according to the Sauerbrey's equation [47].

$$\Delta F = - \frac{2F_0^2}{A\sqrt{\rho_q\mu_q}} \Delta m \quad (1)$$

For the mass change ( $\Delta m$ , g), is given in Eq. (2)

$$\Delta m = - \frac{\Delta F \cdot A}{S_Q} \quad (2)$$

where  $\Delta F$  is the measured irreversible frequency shift,  $\Delta m$  the mass change (g),  $A$  the electrode area  $0.2 \text{ cm}^2$ ,  $\rho_q$  the density of quartz ( $2.648 \text{ g}\cdot\text{cm}^{-3}$ ) and  $\mu_q$  the shear modulus of quartz for AT-cut crystal ( $2.947 \times 10^{11} \text{ g}\cdot\text{cm}^{-1}\cdot\text{s}^{-2}$ ) so that  $\rho_q\mu_q$  is  $2.26 \times 10^8 \text{ cm}^2\cdot\text{g}\cdot\text{s}^{-1}$ , 10 MHz AT-cut Quartz was used in the study. The molecule numbers on working surface is obtained from the mass change ( $\Delta m$ ) in Eq. (2) and Eq. (3), as follows

$$\begin{aligned} \text{Number of mols} &= \frac{\text{gram (mass)}}{\text{Molecular weight (Mw)}} = \frac{\text{number of molecules}}{6.022 \times 10^{23} \text{ (Avogadro's number)}} \\ \text{Number of molecules} &= \frac{\Delta m}{Mw} \times (6.022 \times 10^{23}) \end{aligned} \quad (3)$$

Example; Figure 1 shows the  $\Delta F$  of -342 Hz,

$$\begin{aligned} \Delta m &= - \frac{\Delta F \cdot A}{S_Q} \\ \therefore \Delta m &= - \frac{-342 \times 0.2}{(2.26 \times 10^8)} = 0.303 \times 10^{-6} \text{ gram} = 0.303 \mu\text{g} \end{aligned}$$

Therefore, the estimation of mass on working surface is  $0.3 \mu\text{g}$

$$\begin{aligned} \text{Number of molecules} &= \frac{\Delta m}{Mw} \times (6.022 \times 10^{23}) \\ \therefore \text{molecule} &= \frac{0.3 \times 10^{-6}}{9982.52} (6.022 \times 10^{23}) = 1.81 \times 10^{13} \text{ molecules} \end{aligned}$$

Therefore, the number of molecules of ssDNA probe on surface contain approximately  $1.8 \times 10^{13}$  molecules.
